# Supplementary material
Source: Springer Nature journal article supplement (https://www.springermedizin.de/resource/supplementary/12943_2010_684_MOESM4_ESM.pdf/9554574)

a

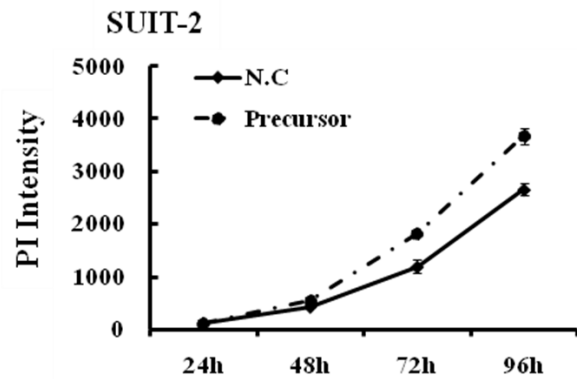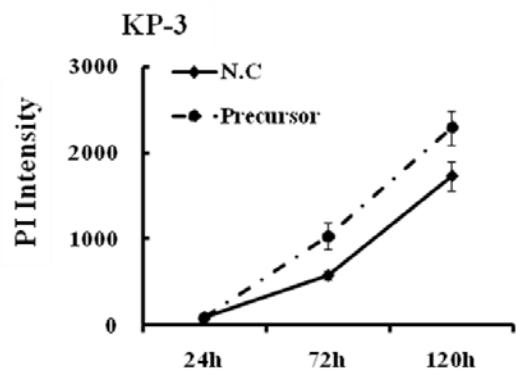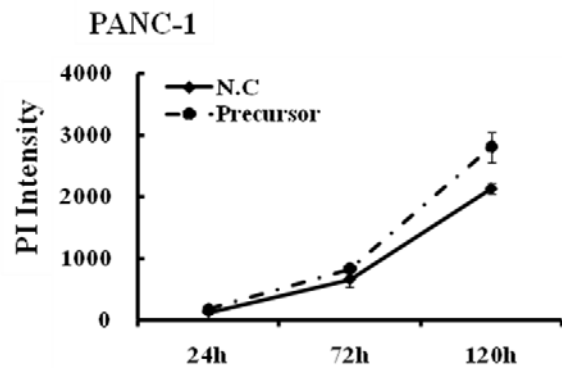

b

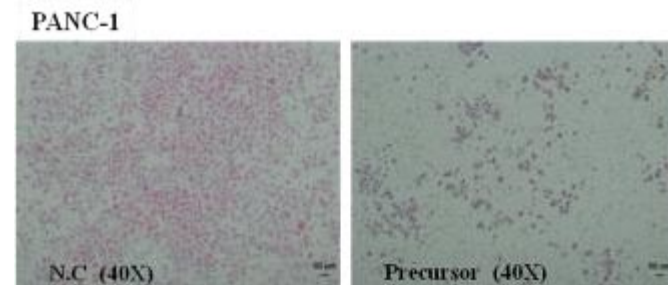

c

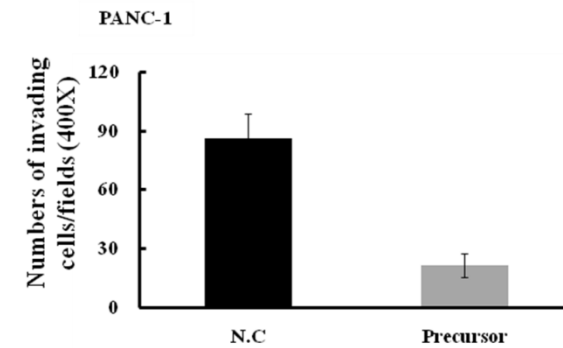

d

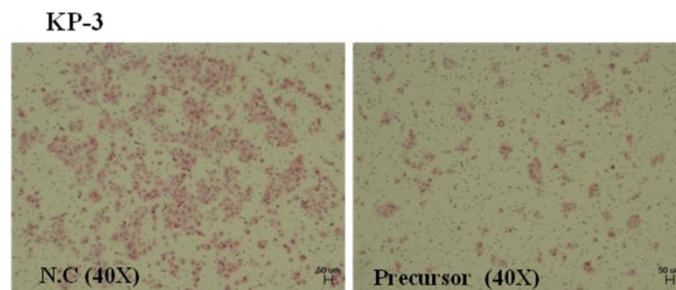

e

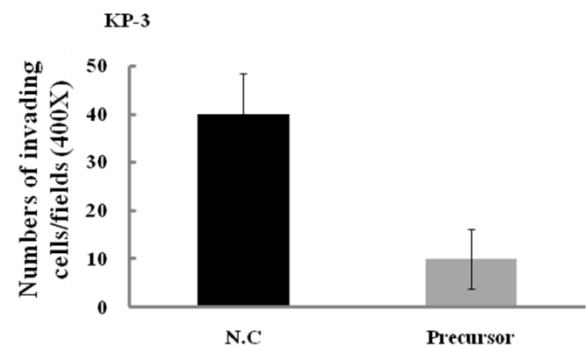

Supplement: MOESM4 [file 9554574]
